# Supplementary material for: Experiences with archived raw diffraction images data: capturing cisplatin after chemical conversion of carboplatin in high salt conditions for a protein crystal
Source: PubMed Central journal article supplement (PMC3795548; doi:10.1107/s0909049513020724), 2013-10-01

## Supplementary Materials

**Figure S1** Anomalous signal to noise ratio for each crystal processed with the different software packages.

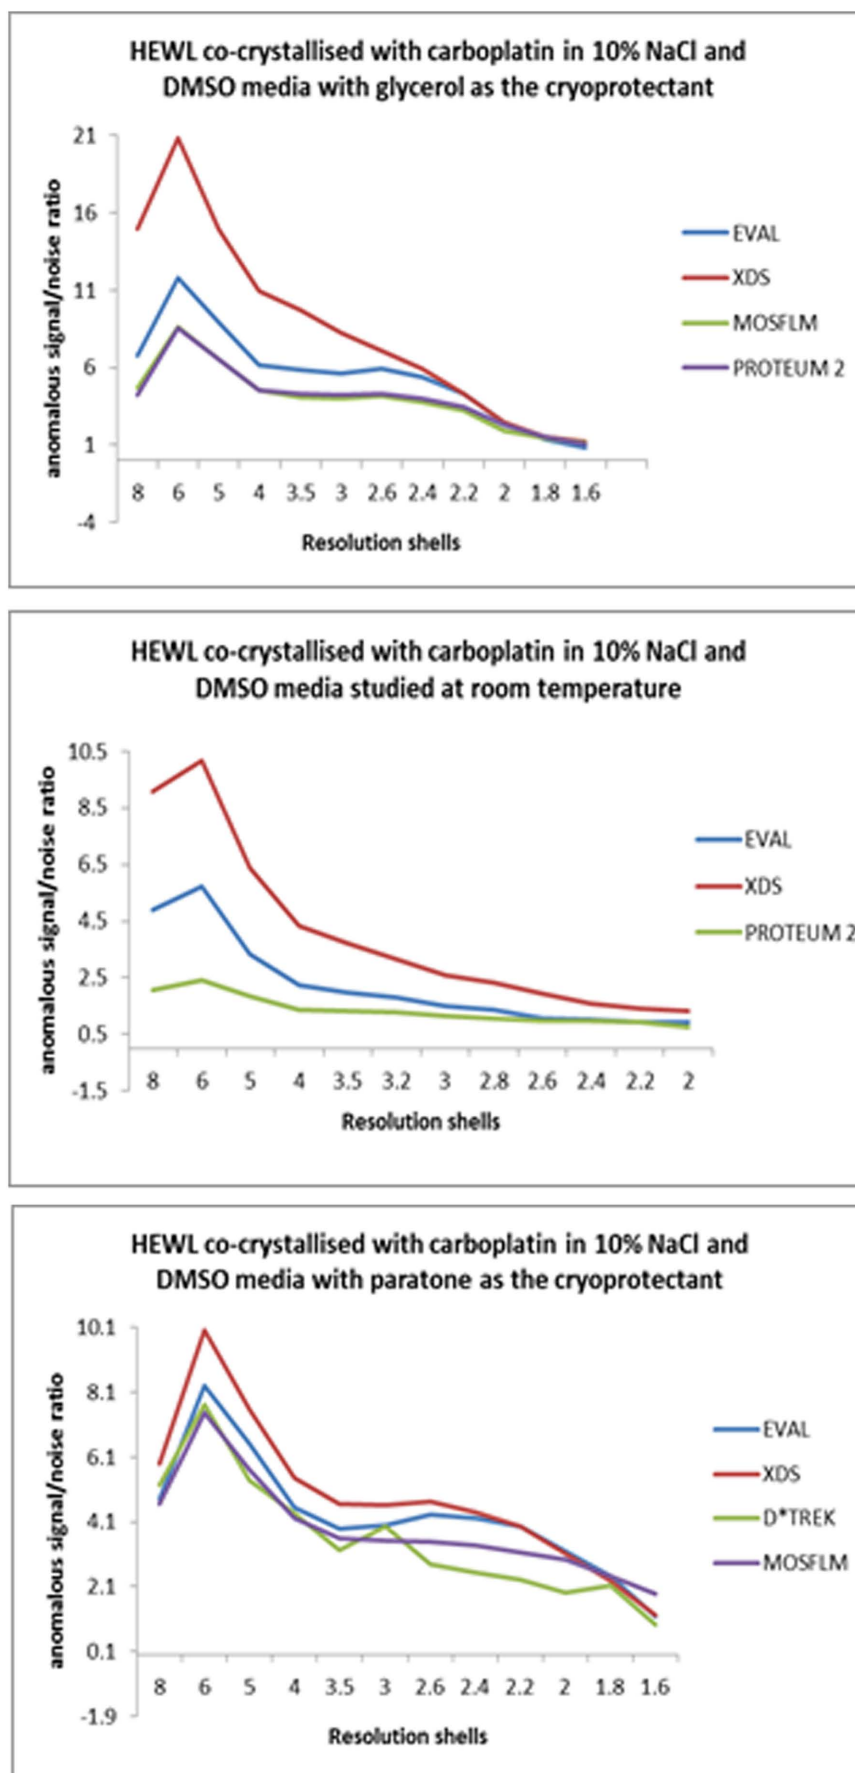

Supplement: s-20-00880-sup1.pdf [file s-20-00880-sup1.pdf]
